# Supplementary material for: Competitive Analysis of Rumen and Hindgut Microbiota Composition and Fermentation Function in Diarrheic and Non-Diarrheic Postpartum Dairy Cows
Source: MDPI journal article supplement (doi:10.3390/microorganisms12010023), 2023-12-22
Supplement: s1 [file s1]

**Table S1.** The ingredients and chemical composition of the experimental dairy cows

| Items                     | Percentages |
|---------------------------|-------------|
| Ingredients, %            |             |
| Alfalfa hay               | 15.24       |
| Oat hay                   | 4.21        |
| Whole plant corn silage   | 38.5        |
| Corn grain, steam flaked  | 15.15       |
| Yeast culture             | 1.17        |
| Soybean meal              | 13.38       |
| Cottonseed                | 5.32        |
| Molasses                  | 2.28        |
| 5% premix                 | 3.8         |
| Fat powder                | 0.95        |
| Nutritive values          |             |
| DM (%)                    | 53.18       |
| Crude protein (%)         | 18.08       |
| Ether extract (%)         | 5.04        |
| ADF (%)                   | 20.65       |
| NDF (%)                   | 31.65       |
| Starch (%)                | 25.61       |
| NE <sub>L</sub> , Mcal/kg | 1.78        |
| Calcium (%)               | 0.97        |
| Phosphorus (%)            | 0.47        |

DM = dry matter, NDF = neutral detergent fiber, ADF = acid detergent fiber.

Premix: 1 kg of premix included Ca 160 g, Cu 630 mg, P 37 g, Mn 1200 mg, I 28 mg, Zn 2700 mg, Se 21 mg, vitamin A 925,340 IU, vitamin D3 253,458 IU, vitamin E 7,689 mg, niacin 5,980 mg.

NEL: Net energy of lactation, a calculated value according to NRC (2001).

**Table S2.** The milk composition and apparent total tract digestibility of the different fecal score dairy cows on 9 Days in milk

| Items <sup>1</sup>            | Groups     |            | SEM   | P-value |
|-------------------------------|------------|------------|-------|---------|
|                               | LFS (n=12) | HFS (n=12) |       |         |
| Milk yield, kg/d              | 34.35      | 30.75      | 1.54  | 0.158   |
| Milk composition, %           |            |            |       |         |
| Fat                           | 4.84       | 4.22       | 0.32  | 0.339   |
| Protein                       | 3.29       | 3.48       | 0.06  | 0.129   |
| Lactose                       | 4.94       | 5.01       | 0.18  | 0.408   |
| TS                            | 13.07      | 12.70      | 1.37  | 0.534   |
| MUN, mg/dL                    | 15.13      | 15.27      | 0.44  | 0.888   |
| SCC, 10 <sup>3</sup> cells/mL | 117.45     | 84.45      | 13.24 | 0.436   |
| Digestion, %                  |            |            |       |         |
| NDF                           | 53.85      | 55.67      | 1.58  | 0.605   |
| ADF                           | 46.93      | 50.94      | 1.60  | 0.253   |
| EE                            | 74.32      | 75.55      | 1.48  | 0.707   |
| CP                            | 65.80      | 73.48      | 1.96  | 0.058   |
| OM                            | 71.06      | 75.62      | 2.14  | 0.147   |

<sup>1</sup>LFS: low fecal score, HFS: high fecal score, TS: total solid, MUN: milk urea nitrogen, SCC: somatic cell count, BHBA:  $\beta$ -hydroxybutyric acid, SEM: standard error of the mean.

NDF: neutral detergent fiber, ADF: acid detergent fiber, EE: ether extract, CP: crude protein, OM: organic matter.

**Table S3.** The different ruminal and fecal bacteria genera in the two groups based on the Wilcoxon Rank Sum Test P value

| Items                                  | Groups |      | SEM   | P     | adjP  |
|----------------------------------------|--------|------|-------|-------|-------|
|                                        | HFS    | LFS  |       |       |       |
| <b>Rumen</b>                           |        |      |       |       |       |
| <i>Bifidobacterium</i>                 | 0.70   | 0.22 | 0.128 | 0.028 | 0.77  |
| <i>Lachnospiraceae_NK3A20_group</i>    | 2.82   | 1.69 | 0.292 | 0.033 | 0.71  |
| <i>Prevotellaceae_UCG-004</i>          | 0.24   | 0.37 | 0.031 | 0.030 | 0.73  |
| <b>Fecal</b>                           |        |      |       |       |       |
| <i>Bifidobacterium</i>                 | 4.25   | 1.04 | 0.79  | 0.046 | 0.430 |
| <i>Breznakia</i>                       | 0.05   | 0.01 | 0.01  | 0.028 | 0.380 |
| <i>Candidatus_Stoquefichus</i>         | 0.21   | 0.03 | 0.04  | 0.010 | 0.200 |
| <i>Cellulosilyticum</i>                | 0.33   | 0.05 | 0.06  | 0.003 | 0.090 |
| <i>Defluviitaleaceae_UCG-011</i>       | 0.25   | 0.05 | 0.03  | 0.000 | 0.073 |
| <i>Eubacterium_brachy_group</i>        | 0.14   | 0.51 | 0.09  | 0.010 | 0.200 |
| <i>Eubacterium_oxidoreducens_group</i> | 0.07   | 0    | 0.02  | 0.033 | 0.380 |
| <i>Family_XIII_UCG-001</i>             | 0      | 0.02 | 0.01  | 0.033 | 0.369 |
| <i>Frisingicoccus</i>                  | 0.18   | 0    | 0.04  | 0.003 | 0.081 |
| <i>Intestinibacter</i>                 | 0.27   | 0    | 0.05  | 0.003 | 0.090 |
| <i>Lachnospiraceae_FCS020_group</i>    | 0.36   | 0.20 | 0.05  | 0.048 | 0.430 |
| <i>Lachnospiraceae_NK3A20_group</i>    | 0.06   | 0.72 | 0.17  | 0.002 | 0.079 |
| <i>Lachnospiraceae_UCG-001</i>         | 0.36   | 0.04 | 0.06  | 0.003 | 0.063 |
| <i>Marvinbryantia</i>                  | 0.49   | 0.17 | 0.07  | 0.035 | 0.380 |
| <i>Mogibacterium</i>                   | 0.01   | 0.10 | 0.03  | 0.039 | 0.390 |
| <i>Peptoclostridium</i>                | 0      | 0.01 | <0.01 | 0.013 | 0.220 |
| <i>Prevotellaceae_UCG-004</i>          | 0.11   | 0.65 | 0.11  | 0.029 | 0.380 |
| <i>Pygmaibacter</i>                    | 0.36   | 0.17 | 0.04  | 0.019 | 0.300 |

LFS: low fecal score, HFS: high fecal score, SEM: standard error of the mean. adjP: false discovery rate corrected P value. Wilcoxon Rank Sum Test was used to compare the difference of fecal bacteria genera relative abundance between the two groups, and P value with false discovery rate correction < 0.05 was considered significant.
